# Supplementary material for: The complete mitochondrial genomes of two band-winged grasshoppers, Gastrimargus marmoratus and Oedaleus asiaticus
Source: PubMed Central journal article supplement (PMC2674460; doi:10.1186/1471-2164-10-156), 2009-04-10

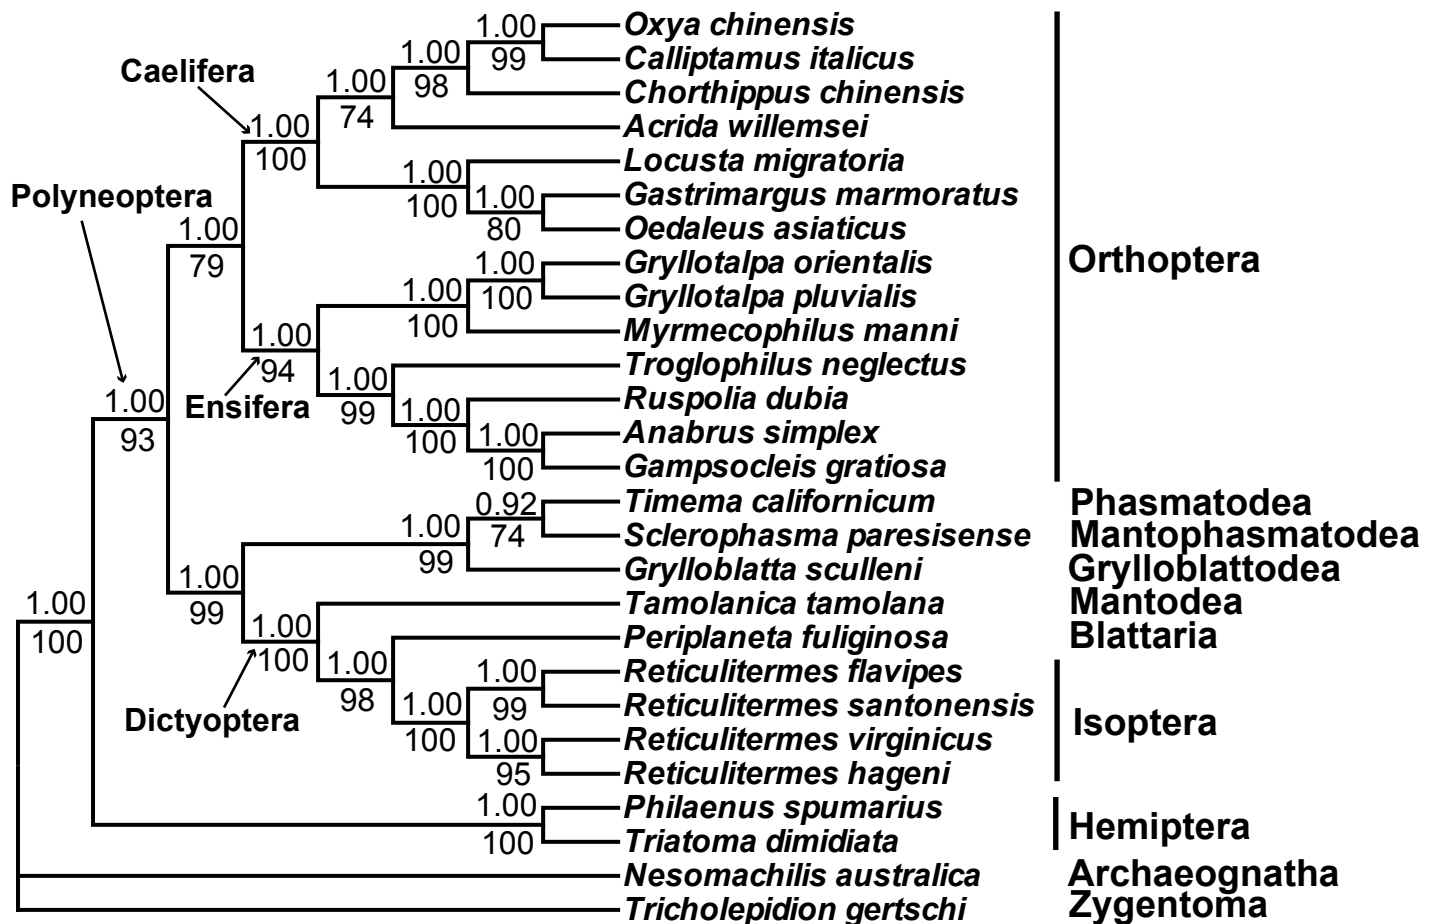

Supplement: 1471-2164-10-156-S3.pdf [file 1471-2164-10-156-S3.pdf]
